# Supplementary material for: Resting-State Functional Connectivity by Independent Component Analysis-Based Markers Corresponds to Areas of Initial Seizure Propagation Established by Prior Modalities from the Hypothalamus
Source: PubMed Central journal article supplement — Brain Connect. 2016 Oct 1;6(8):642–51. doi: 10.1089/brain.2015.0404 (PMC5069733; doi:10.1089/brain.2015.0404), 2016-10-01
Supplement: Supp_Figure1.pdf [file Supp_Figure1.pdf]

## Supplementary Data

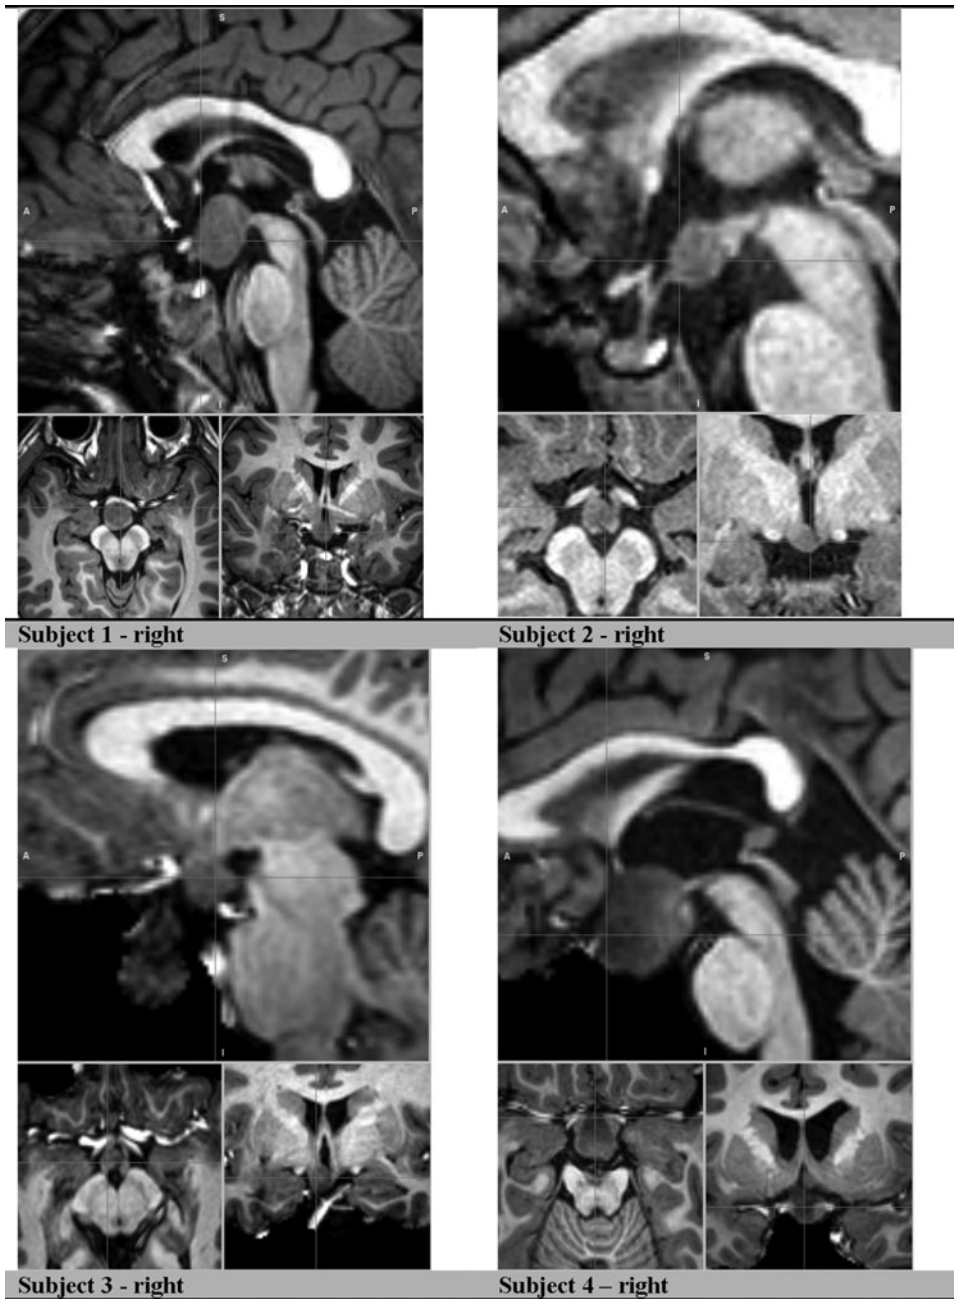

**SUPPLEMENTARY FIG. S1.** Enlarged sagittal with smaller axial and coronal images for each subject with crosshair on the hypothalamic hamartoma; asymmetric dominant hemispheric localization specified as left or right.

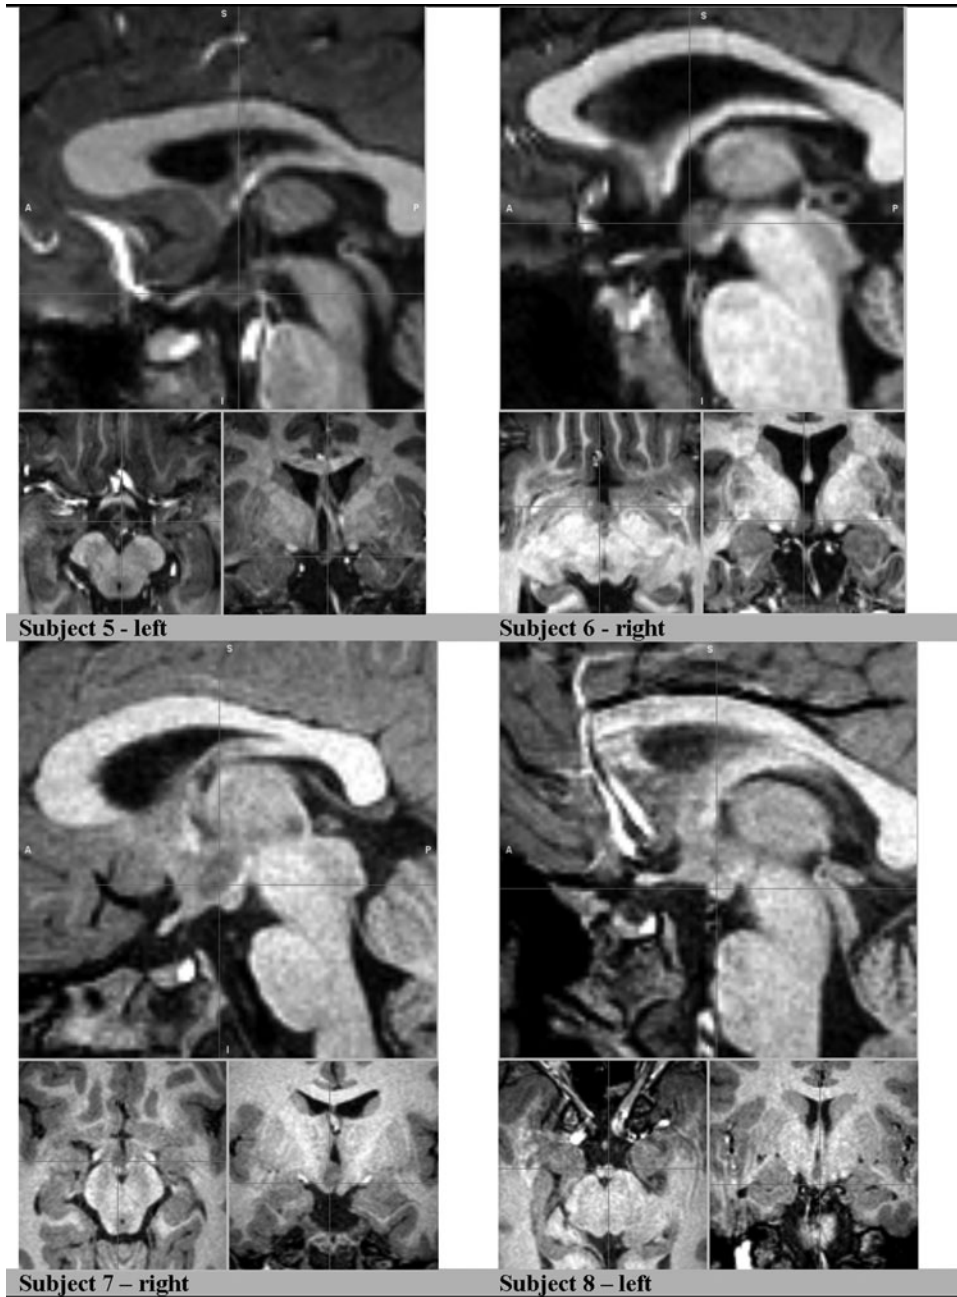

**SUPPLEMENTARY FIG. S1.** (Continued).

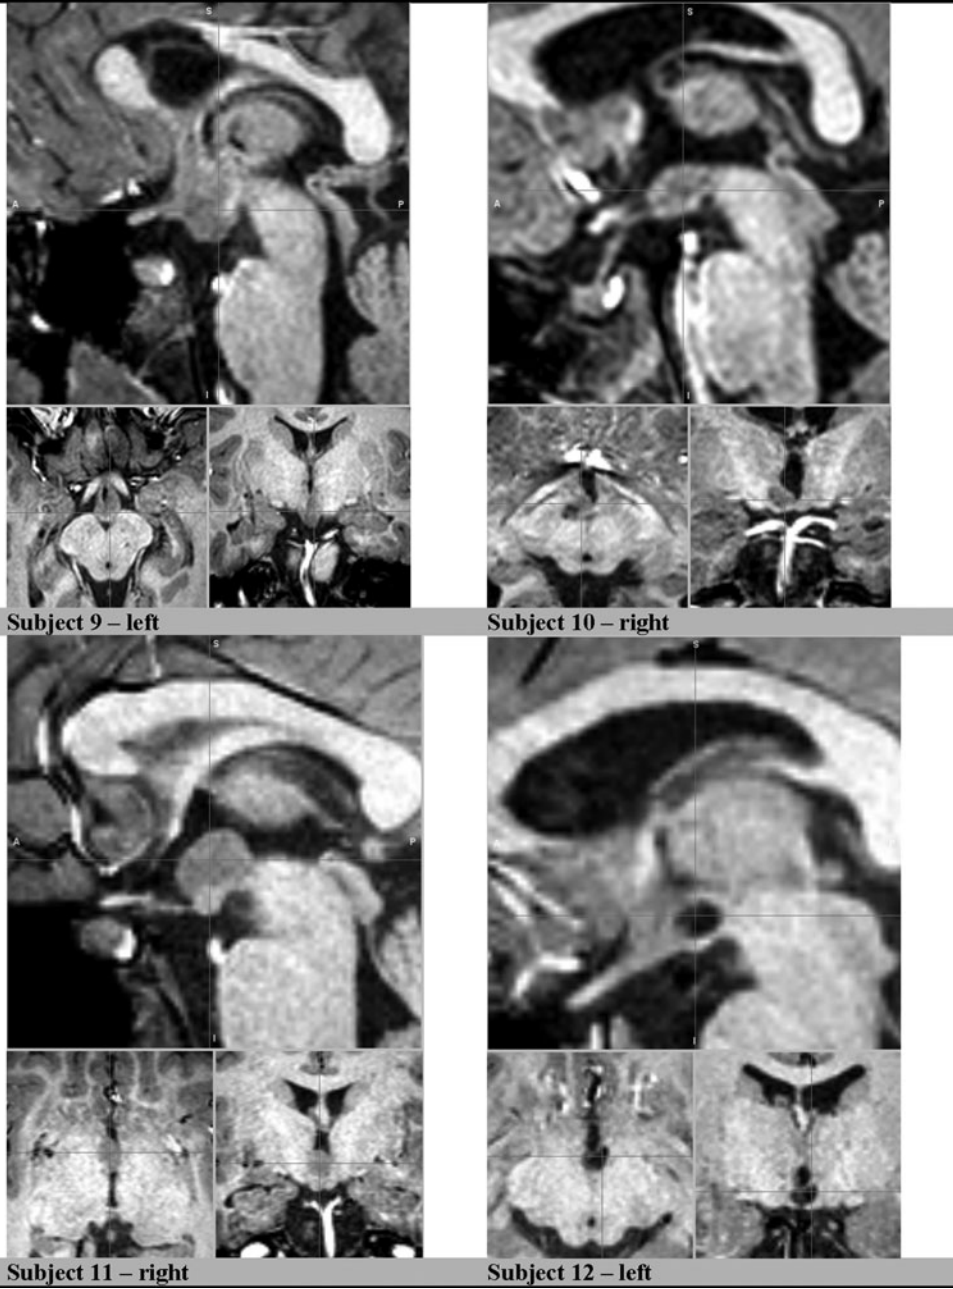

SUPPLEMENTARY FIG. S1. (Continued).
