# Supplementary material for: Resting-State Functional Connectivity by Independent Component Analysis-Based Markers Corresponds to Areas of Initial Seizure Propagation Established by Prior Modalities from the Hypothalamus
Source: PubMed Central journal article supplement — Brain Connect. 2016 Oct 1;6(8):642–51. doi: 10.1089/brain.2015.0404 (PMC5069733; doi:10.1089/brain.2015.0404), 2016-10-01
Supplement: Supp_Figure2.pdf [file Supp_Figure2.pdf]

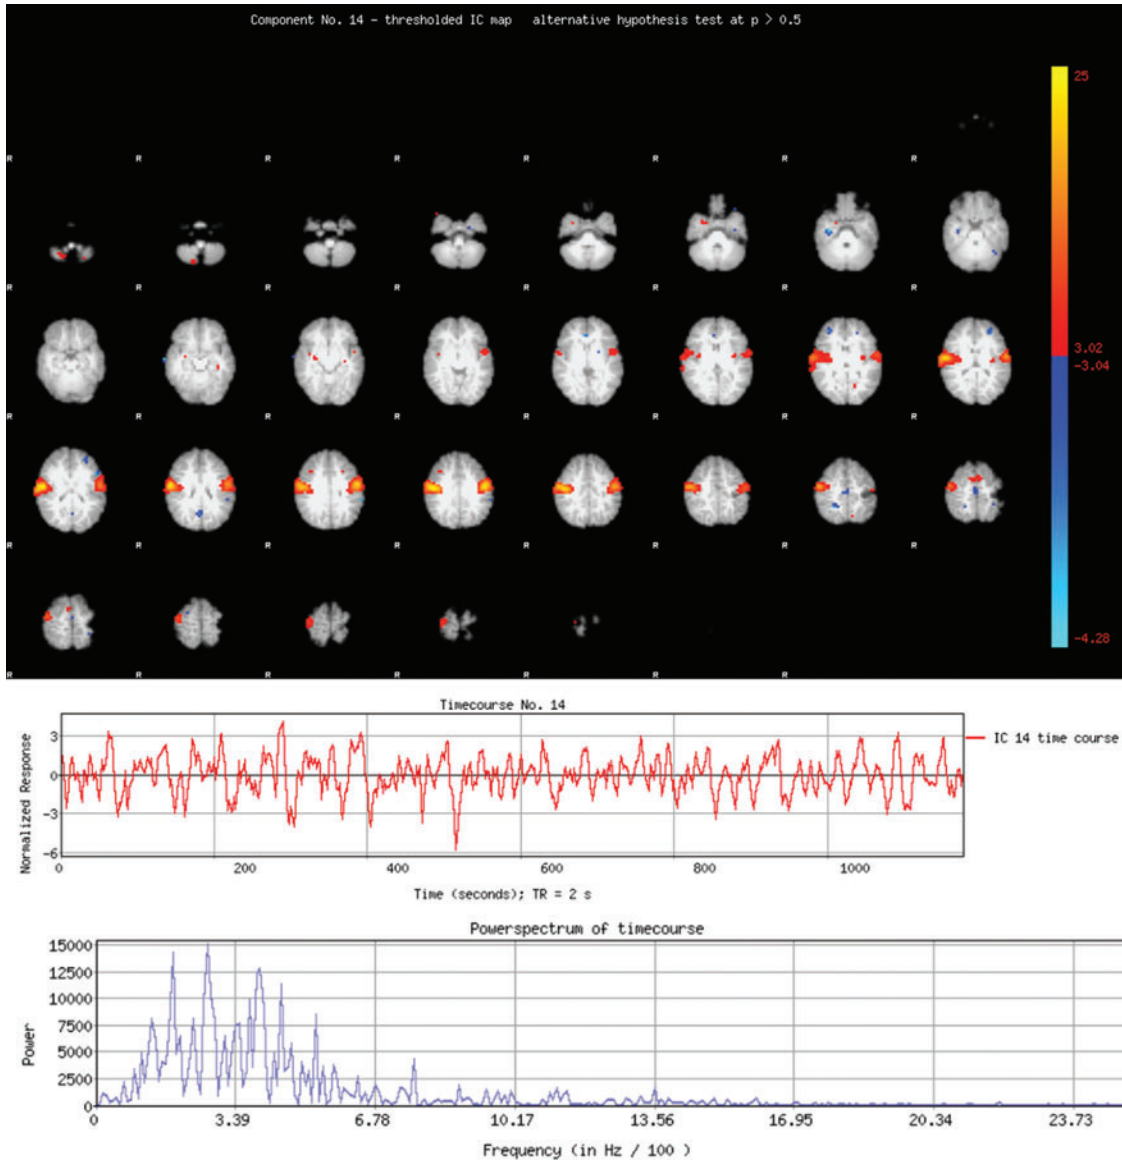

**SUPPLEMENTARY FIG. S2.** Sample of ICA-derived brain network (primary sensory-motor face area) with associated BOLD signal plot over 10 min (red graph) and frequency distribution plot (blue graph). For each signal source, the results also yield two graphs. One shows how the source's BOLD signal changes over time. Resting-state neuronal network signal is known to oscillate in a smooth slow pattern over time. The second graph shows how much of the signal from that source was detected over the expected frequency range. Resting-state neuronal networks are known to oscillate near 0.01 Hz. These images and graphs allow the user to separate neuronal from non-neuronal signal sources. BOLD, blood oxygen level dependent; ICA, independent component analysis.
