# Supplementary material for: Resting-State Functional Connectivity by Independent Component Analysis-Based Markers Corresponds to Areas of Initial Seizure Propagation Established by Prior Modalities from the Hypothalamus
Source: PubMed Central journal article supplement — Brain Connect. 2016 Oct 1;6(8):642–51. doi: 10.1089/brain.2015.0404 (PMC5069733; doi:10.1089/brain.2015.0404), 2016-10-01
Supplement: Supp_Figure3.pdf [file Supp_Figure3.pdf]

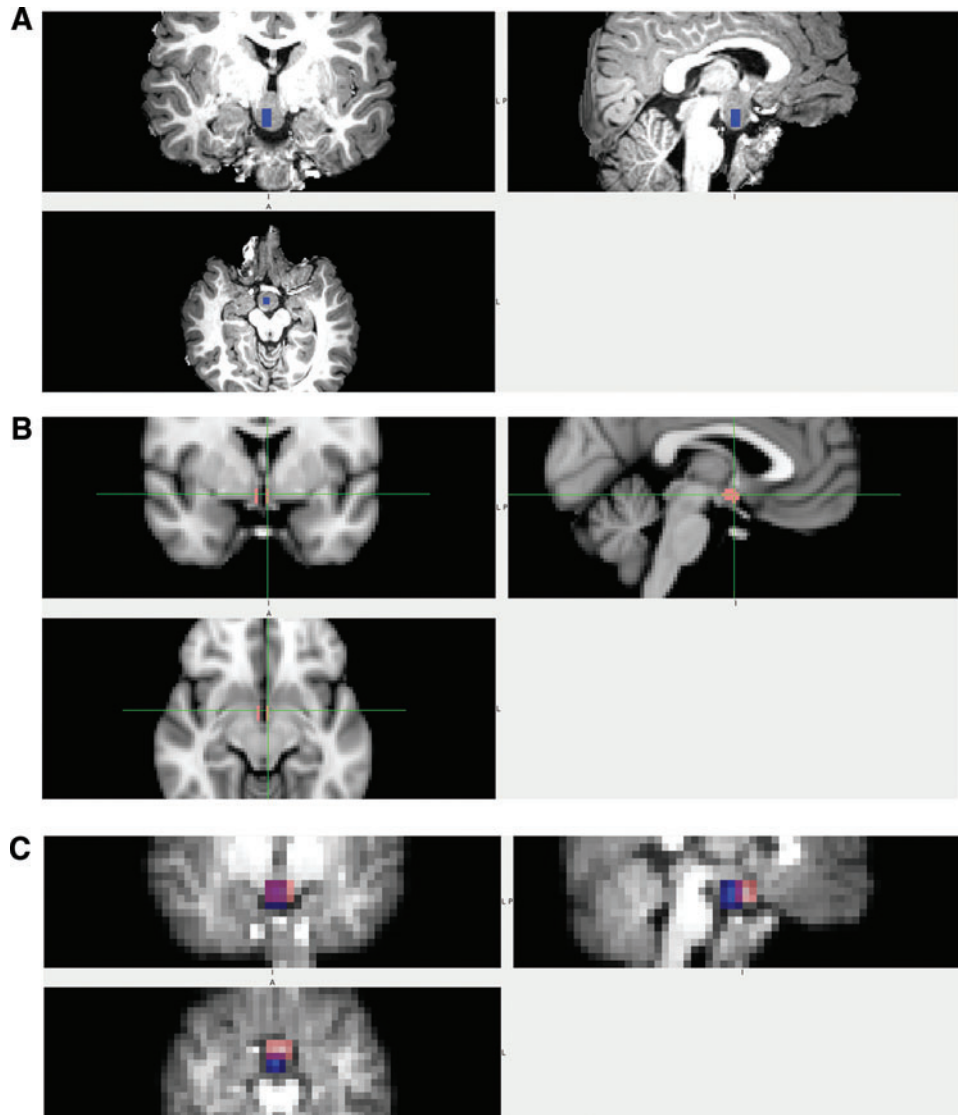

**SUPPLEMENTARY FIG. S3.** (A) The blue areas indicate the location of the bilateral hypothalamic mask. Shown in this study is an example of individual HH mask, from subject 1. (B) The pink areas indicate the location of the 2 mm MNI standard space bilateral hypothalamic group mask. (C) The overlap of the individual HH mask and the group hypothalamic mask shown on individual MRI transformed to standard space dimensions. HH, hypothalamic hamartoma.
